# Supplementary material for: Cyclin D1 Represses Gluconeogenesis via Inhibition of the Transcriptional Coactivator PGC1α
Source: Oxford University Press journal article supplement (doi:10.2337/db13-1283), 2014-06-20

# SUPPLEMENTARY DATA

**Supplementary Table 1.** Sequence for primers used in the study.

| Name                           | Forward (5' seq 3')             | Reverse (5'seq3')              |
|--------------------------------|---------------------------------|--------------------------------|
| <b>Mouse:</b>                  |                                 |                                |
| <i>Pgc1<math>\alpha</math></i> | CCC TGC CAT TGT AAA GAC         | TGC TGC TGT TCC TGT TTT        |
| <i>Cyclind1</i>                | GCG TAC CCT GAC ACC AAT CTC     | CTC CTC TTC GCA CTT CTG CTC    |
| <i>Pepck</i>                   | CAG GAT CGA AAG CAA GAC AGT     | AAG TCC TCT TCC GAC ATC GAG    |
| <i>G6pase</i>                  | GAA AAA GCC AAC GTA TGG ATT CC  | CAG CAA GGT AGA TCC GGG A      |
| <i>Cox4i</i>                   | ACC AAG CGA ATG CTG AAC AT      | GGC GGA GAA GCC CTG AA         |
| <i>Cox5b</i>                   | GCT GCA TCT GTG AAG AGG ACA AC  | CAG CTT GTA ATG GGT TCC ACA GT |
| <i>AtpsynF1</i>                | TCT CCA TGC CTC TAA CAC TCG     | CCA GGG TCA ACA GAC GTG TCA G  |
| <i>Cyt-C</i>                   | CCA AAT CTC CAC GGT CTG TTC     | ATC AGG GTA TCC TCT CCC CAG    |
| <i>Actin</i>                   | GAG ACC TTC AAC ACC CC          | GTG GTG GTG AAG CTG TAG CC     |
| <b>Human:</b>                  |                                 |                                |
| <i>PGC1<math>\alpha</math></i> | AAC AGC AGC AGA GAC AAA TGC ACC | TGC AGT TCC AGA GAG TTC CAC    |
| <i>ACT</i>                     |                                 |                                |
| <i>Cyclin D1</i>               | CCG CAC GAT TTC ATT GAA CAC     | TGG CAC AAG AGG CAA CGA A      |
| <i>Cox 4i</i>                  | CGG TGC CAT GTT CTT CAT CGG TTT | TCA TGT CCA GCA TCC TCT TGG    |
| <i>TCT</i>                     |                                 |                                |
| <i>Pepck</i>                   | AAG GAG GAT GCC CTG AAC CTG AAA | TGC ACC TTA TGG ATG GGA AAG    |
| <i>GGA</i>                     |                                 |                                |
| <i>G6pase</i>                  | TGA ATG GCT GCA GTG ACC CAG ATA | TGG ATG TGG AGC CAG TGG AAG    |
| <i>AAT</i>                     |                                 |                                |
| <i>Cox5b</i>                   | GGA AGA CCC TAA TTT AGT CCC CT  | CCA GCT TGT AAT GGG CTC CAC    |
| <i>ATPsynF1</i>                | CTA TGC GGC GCA AAC ATC TC      | GGT GGT AGT CCC TCA TCA AAC T  |
| <i>CYT-C</i>                   | AAG ATT GTG CCA CTG CAC TCA AGC | AGG TGA GCA CAA CAG GAA CTG    |
| <i>GAA</i>                     |                                 |                                |
| <i>Actin</i>                   | GCC CGC GAG CAC AGA             | CCA GGA TGG AGG GGA AGA C      |

## SUPPLEMENTARY DATA

**Supplementary Figure 1.** A) Immunoblotting or B) RTPCR for cyclin D1. A) Wildtype C57Bl/6J mice were euthanized and pancreas, muscle, heart, small intestine, liver, lung, kidney and spleen removed. Protein and RNA were isolated. Proteins were separated by SDS PAGE and transferred to nitrocellulose. Immunoblotting was performed with cyclin D1 or tubulin B) RNA was isolated from the indicated tissues and cDNA synthesized and RTPCR performed for cyclin D1.

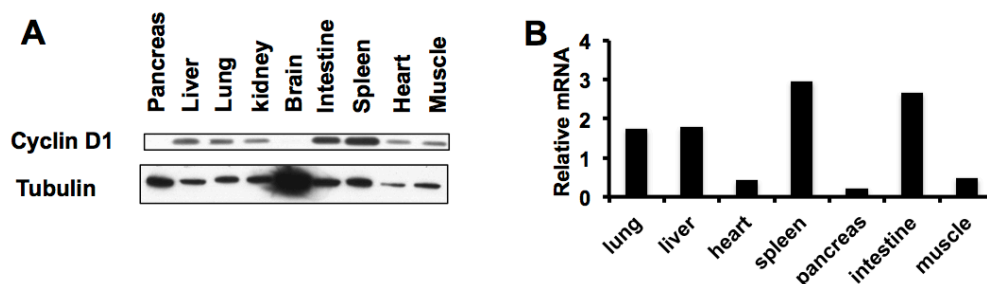

**Supplementary Figure 2.** Glucose levels were determined in fed and fasted mice. Mice were Fed or fasted for A) 6 hr or B) overnight (16 hr). Tails were docked, and blood glucose determined using a glucometer.  $N=6 \pm SD$ . \*  $p < 0.05$ . Changes in C) cyclin D1 and D) gluconeogenic gene expression following a 6 hr fast.  $N=4 \pm SD$ , \*\*  $p < 0.01$ , \*\*\*  $p < 0.001$ . E) Liver PEPCK protein expression following a 6 hr fast.

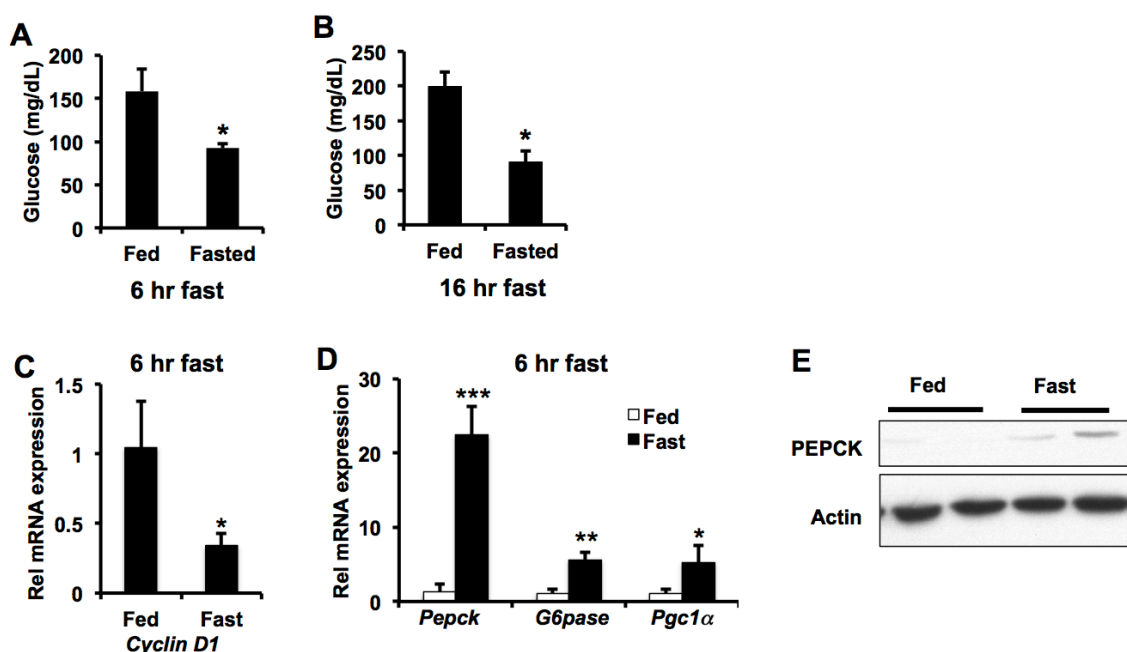

## SUPPLEMENTARY DATA

**Supplementary Figure 3.** Changes in gluconeogenic and OxPhos gene expression following Fast/Fed conditions and 4 hours following refeeding. Mice were fasted overnight and then administered food for four hours. Mice were euthanized, livers removed and RNA isolated RTPCR performed for A) *Pck1*, B) *G6Pase*, C) *Pgc1 $\alpha$* , D) *CytC*, E) *AtpSynF1*, or F) *Cox4i*. N=4  $\pm$  SD. \*  $p < 0.05$ , \*\*  $p < 0.01$ , \*\*\*  $p < 0.001$ .

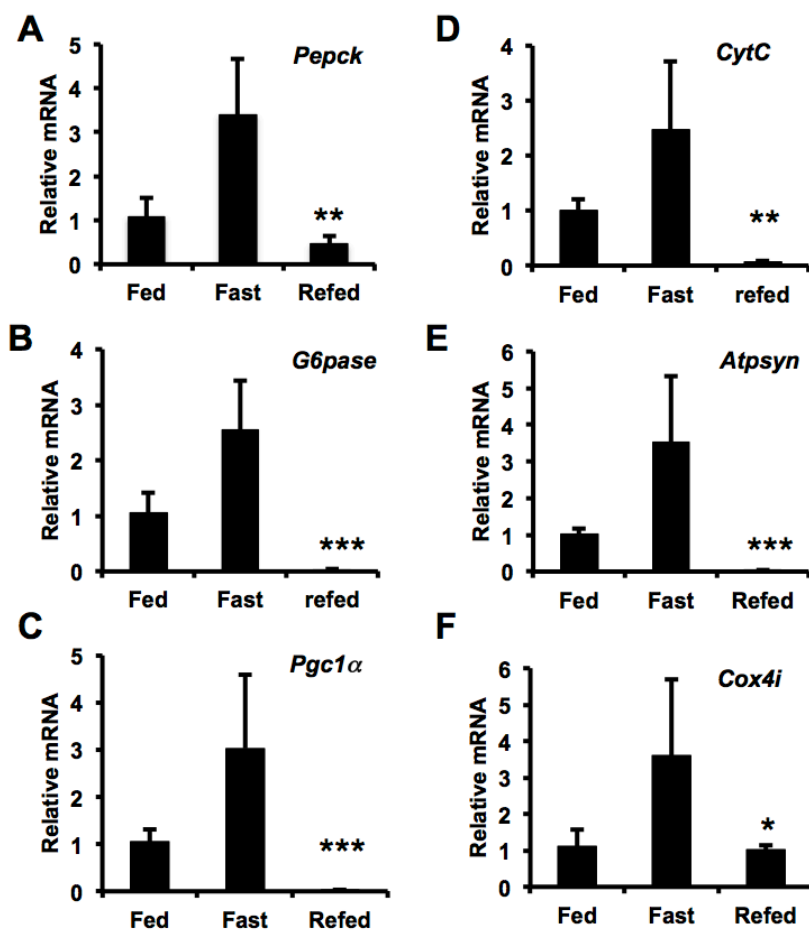

SUPPLEMENTARY DATA

**Supplementary Figure 4.** Wild-type mice and liver-specific *Cyclin d1*<sup>LITg</sup> mice either were fed or fasted overnight. Livers were harvested, RNA was isolated, cDNA was synthesized, and RT-PCR was performed A) *Cyt-C*, B) *cox4i*, and C) *AtpsynF1* RNA from livers of fed and fasted mice. N=4 ± SD. \*p<0.05, \*\*p<0.0001. NS, Not significant, p > 0.05.

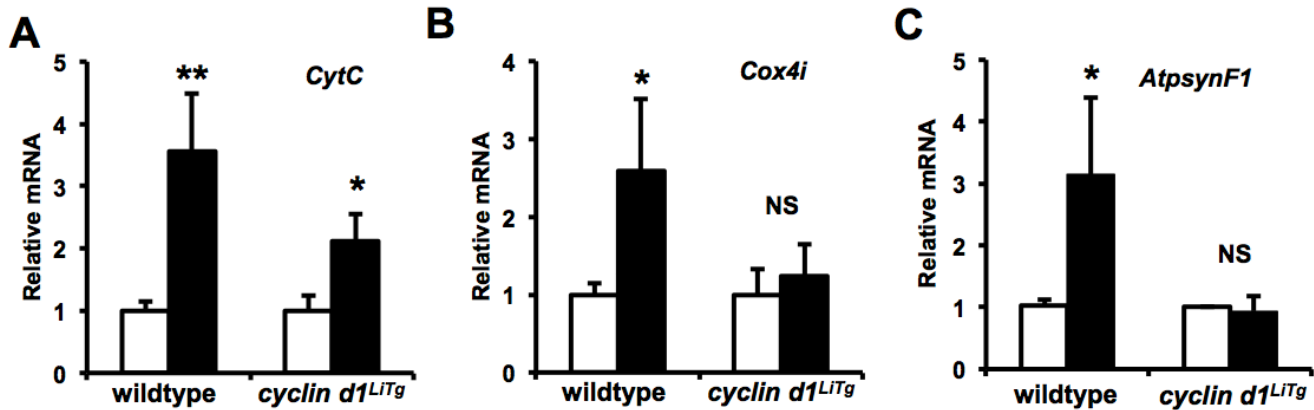

**Supplementary Figure 5.** Activation of CDK4 by cyclin D1 appears necessary for repression of PGC1 $\alpha$  activity. Cos7 cells were transfected with A) G6Pase promoter luciferase construct or B) PEPCK promoter luciferase construct along with 100 ng HNF4, 250 ng of PGC1 $\alpha$  and 250 ng of wild-type or mutant cyclin D1<sup>K112E</sup> expression constructs as indicated and described in materials and methods. Luciferase activity was measured 24 hours following transfection. N=3 ± SD. \* p < 0.05, \*\* p < 0.005, \*\*\* p < 0.0005.

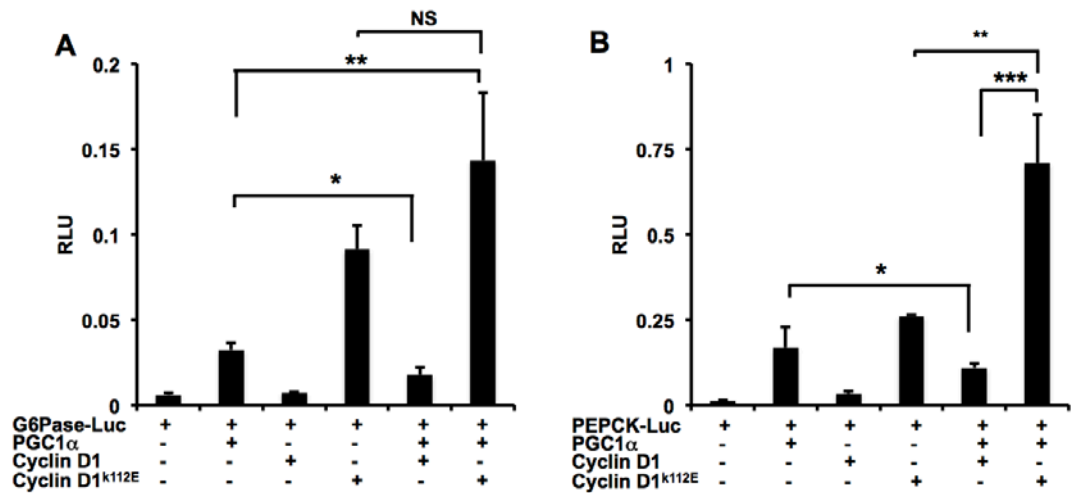

SUPPLEMENTARY DATA

**Supplementary Figure 6.** Cyclin E1 does not alter the transcriptional activity of PGC1 $\alpha$ . Cos7 cells were transfected with A) 50 ng of cytochrome C promoter luciferase construct or B) 100 ng of multimerized NRF1 binding site (NRF1X4) luciferase constructs along with 250 ng of PGC1 $\alpha$  and 250 ng of cyclin D1 or cyclin E1 expression constructs as indicated and described in materials and methods. Cells were harvested after 20 hours, and luciferase activity was measured as described in materials and methods. N=3  $\pm$  SD. \* p < 0.05.

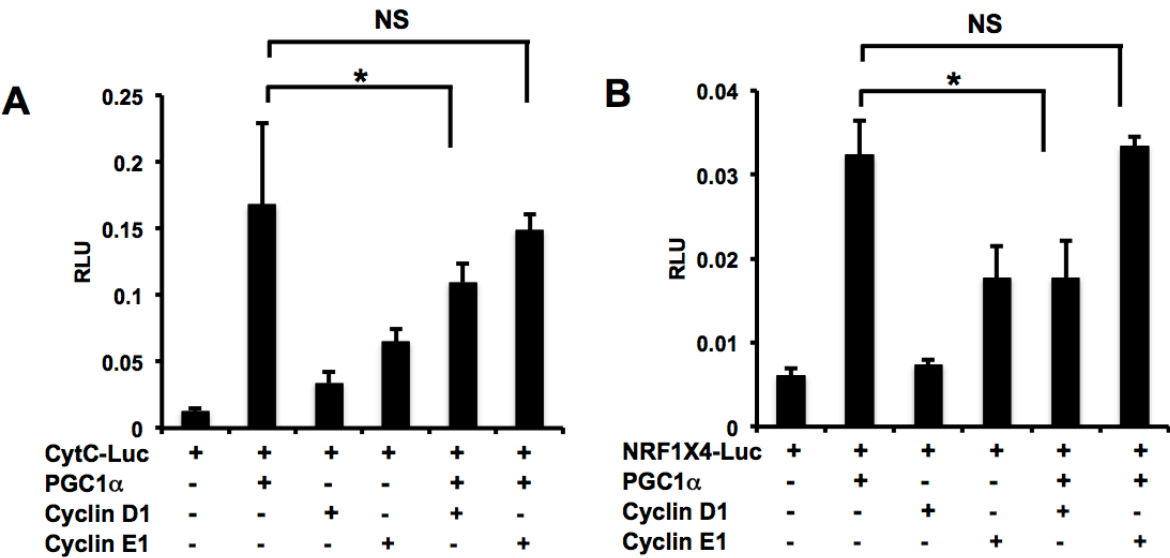

**Supplementary Figure 7.** Pharmacological or genetic loss of CDK4 increases PGC1 $\alpha$  induced OxPhos. A) HepG2 and B) Huh7 cells were infected with PGC1 $\alpha$  adenovirus or control GFP and then treated with 1  $\mu$ M PD0332991 for 20 hours. RNA was isolated, cDNA synthesized, and RT-PCR performed for *Cytochrome C* or *ATP synthase*. N=3  $\pm$  SD. \* p < 0.05, \*\* < 0.01.

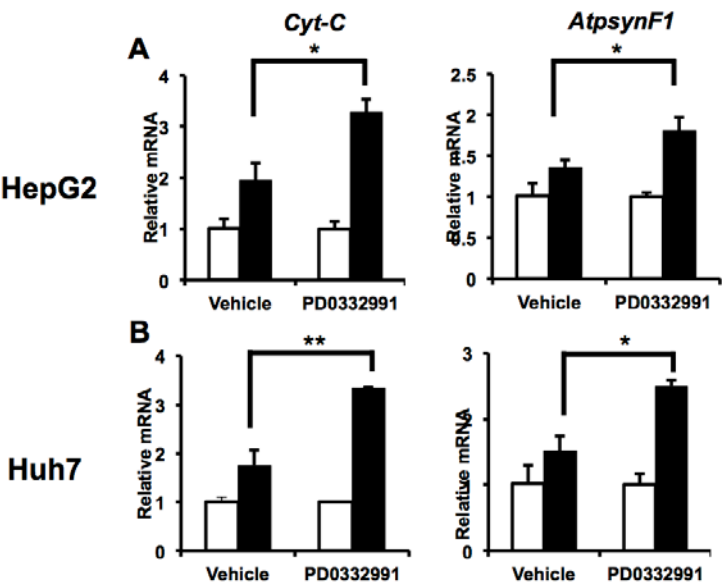

## SUPPLEMENTARY DATA

**Supplementary Figure 8.** MEFs express little *Pepck* or *G6pase*. RNA was extracted from normal mouse liver, MEFs, and murine liver cell line H2.35. RT PCR was performed for *Pepck*, *G6pase* and actin as a housekeeping gene. N=3±SD.

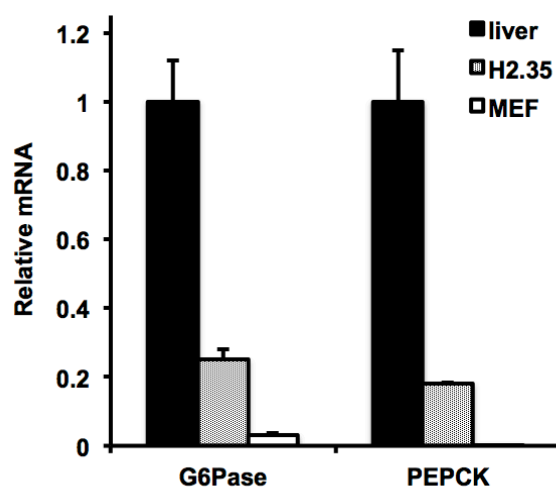

**Supplementary Figure 9.** shRNA against CDK4 was transfected into Huh7 cells for 48 hr. RNA was isolated and RTPCR run for CDK4 to confirm knockdown. N=3±SD. \* < 0.05.

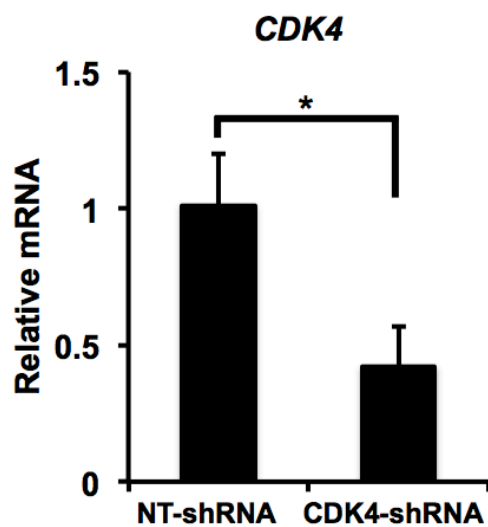

Supplement: db131283supplementarydata.pdf [file db131283supplementarydata.pdf]
